# Supplementary material
Source: MDPI journal article supplement (https://www.mdpi.com/2311-5637/8/9/457)
Supplement: s1 [file s1 › Supplementary file S1.xlsx]

## Sheet: Supplementary file S1
	apple_1a	apple_1b	apple_2a	apple_2b	apple_3a	apple_3b	apple_Ca	apple_Cb	carrot_1a	carrot_1b	carrot_2a	carrot_2b	carrot_3a	carrot_3b	carrot_ca	carrot_cb	orange_1a	orange_1b	orange_2a	orange_2b	orange_3a	orange_3b	orange_ca	orange_cb
Label	Apple	Apple	Apple	Apple	Apple	Apple	Apple	Apple	Carrot	Carrot	Carrot	Carrot	Carrot	Carrot	Carrot	Carrot	Orange	Orange	Orange	Orange	Orange	Orange	Orange	Orange
Carbon dioxide	1e-14	1e-14	1e-14	1e-14	1e-14	1e-14	1e-14	1e-14	0.00683873	0.0189854	0.0133078	0.0157294	0.0140412	0.0120148	1e-14	1e-14	1e-14	1e-14	1e-14	1e-14	1e-14	1e-14	1e-14	1e-14
Acetic acid, methyl ester	0.0306985	0.0620663	0.0134203	0.0202383	0.0367475	0.0664348	0.0167067	0.0169626	0.00293267	0.00255902	0.00289677	0.00311245	0.00767737	0.0101502	0.00364593	0.00197361	0.0116056	0.00757166	0.0127636	0.00988026	0.00732006	0.0279012	0.000909747	0.00216392
Ethyl Acetate	0.230975	0.240553	0.238209	0.210362	0.262725	0.251939	0.0423826	0.0426236	0.00137168	0.00300508	0.00455812	0.00702591	0.00483178	0.0018847	0.00558438	0.00576831	0.169437	0.174125	0.156702	0.157636	0.164836	0.161918	0.00902624	0.00952297
Pentanal	0.000975125	0.000764531	0.000538277	0.00469357	0.000826045	0.000820845	0.00414542	0.00417614	0.000132785	0.000139901	0.000172302	0.000110853	0.000148564	0.00082291	0.0190971	0.0190907	7.44e-05	9.1e-05	0.000132848	0.000122656	0.000111142	0.000120507	0.000614531	0.000628006
Butanoic acid, methyl ester	0.00134281	0.00139562	0.000703198	0.00119266	0.00133632	0.00131824	0.00226196	0.0023848	0.000601639	0.000630074	0.000597041	0.000651504	0.000287237	0.000275966	5.64e-05	3.68e-05	0.000412489	0.000459777	0.000471751	0.000471428	0.00047891	0.00039715	0.000113133	6.26e-05
1-Butanol, 3-methyl-	0.0747131	0.0849555	0.0706606	0.0679877	0.0831138	0.0843441	0.0227356	0.0261383	0.0434945	0.0461659	0.0513004	0.052449	0.0455367	0.0416065	0.000275409	0.000267943	0.0113045	0.0115937	0.00751371	0.00813168	0.0101073	0.00880398	0.00019835	0.000179247
3-Penten-2-one	0.00412418	0.00484491	0.00387484	0.00379329	0.00470841	0.0048212	0.00110883	0.00127336	0.00240478	0.00263746	0.00293619	0.00303144	0.00257796	0.00223284	0.00150545	0.00146299	0.000563464	0.000560293	0.00036809	0.000378733	0.000492496	0.000431023	0.000300772	0.000243606
1-Butanol, 2-methyl-	0.0345039	0.0471758	0.0372953	0.0280642	0.0350315	0.0438242	0.0159827	0.0192854	0.0283849	0.0299673	0.0376138	0.0389825	0.0291509	0.0267987	4.57e-05	5.09e-05	0.0040792	0.00467487	0.00435	0.00534045	0.00563252	0.00433551	2.34e-05	2.66e-05
Propanoic acid, 2-methyl-, ethyl ester	0.0021844	0.00251532	0.00200388	0.00150675	0.00218706	0.00280898	0.00124594	0.00129623	0.00114872	0.00175473	0.00167625	0.00182998	0.00276799	0.00229128	6.48e-05	6.88e-05	0.00129477	0.00134452	0.00442801	0.00452969	0.00337097	0.00315587	1.47e-05	6.48e-06
2-Butenoic acid, methyl ester, (E)-	0.00303117	0.00318549	0.000962823	0.00117882	0.00312446	0.00309099	0.00474033	0.00494353	0.000192311	0.000199035	8.62e-05	8.62e-05	0.000113141	0.00013948	4.36e-05	6.29e-05	7.66e-05	9.2e-05	0.000109044	0.000112103	5.26e-05	4.84e-05	0.000248557	0.000227618
Butanoic acid, 2-methyl-, methyl ester	0.00151046	0.00160925	0.000669838	0.00143585	0.00162658	0.00145604	0.00335682	0.0035285	0.00134514	0.0012808	0.0013859	0.00155978	0.000577909	0.000747405	0.000120869	9.38e-05	0.000128748	0.000157721	0.000675642	0.000638735	0.000232361	0.0002129	5.24e-05	4.88e-05
Butanoic acid	0.00171999	0.00184759	0.000828787	1e-14	0.00200466	0.00184259	0.00156322	0.00263199	1e-14	0.000914962	0.000486226	0.000840695	0.000850869	0.000115587	0.00131938	0.00114524	0.00030066	0.000212381	0.000283431	0.000253426	1e-14	1e-14	1e-14	1e-14
3-Hexen-2-one	0.000713019	0.000830239	0.00126408	0.00146847	0.000735427	0.000746806	0.000397593	0.000471711	0.000373649	0.000397764	0.000216391	0.000235137	0.000148683	0.000157774	0.000217581	0.000213026	1e-14	1e-14	1.91e-05	2.38e-05	1e-14	1e-14	1.34e-05	2.16e-06
Butanoic acid, ethyl ester	6.09e-05	0.000781464	0.0122636	0.000359645	1e-14	0.000204548	0.00343077	0.00765342	1e-14	1e-14	0.000156213	0.00176289	1e-14	0.00786089	0.00812652	0.00817218	0.00471664	1e-14	0.00152815	0.00175871	1e-14	1e-14	1.81e-06	0.00123051
Hexanal	0.00115346	0.000761549	0.00110078	0.00068071	0.000941589	0.000769681	0.0240449	0.0243721	0.000484916	0.000451445	0.000670252	0.000378079	0.000588512	0.000884556	0.090207	0.0892057	0.000222468	1.46e-05	7.42e-05	8.52e-05	8.37e-06	2.57e-05	0.00178569	0.00181251
Cyclotrisiloxane, hexamethyl-	0.00225478	0.00154514	0.00208869	0.00146898	0.00184858	0.00124165	0.00159026	0.00200596	0.000713642	0.000934878	0.000983552	0.00104623	0.000625061	0.00163307	0.00103752	0.0010853	1e-14	1e-14	1e-14	1e-14	1e-14	1e-14	1e-14	1e-14
Methyl valerate	0.000143791	0.000176037	5.07e-05	7.3e-05	0.000149205	0.000133603	0.000176531	0.000177405	0.00378786	0.00417588	0.00339086	0.00371266	0.00157254	0.00151793	1e-14	3.4e-06	5.8e-06	9.16e-07	2.34e-05	2.08e-05	1.05e-06	6.74e-06	1e-14	8.1e-07
Furfural	0.000390028	0.00040841	0.000257066	0.000326418	0.000618252	0.000466892	0.132135	0.130339	1.7e-05	1.15e-05	1.71e-05	8.08e-06	1.2e-05	2.33e-05	0.00782307	0.0079193	1.79e-05	1.78e-05	2.22e-05	3.11e-05	1.7e-05	1.97e-05	0.012427	0.010438
1H-Pyrazole, 3-methyl-	2.07e-05	2.36e-05	1.56e-05	1e-14	2.45e-05	1.66e-05	2.35e-05	2.28e-05	1e-14	8.82e-06	1e-14	2.37e-06	7.11e-06	2.66e-06	0.000129059	9.45e-05	1e-14	4.58e-07	5.38e-06	1e-14	3.01e-07	8.93e-06	1e-14	2.02e-06
2-Butenoic acid, ethyl ester, (Z)-	0.00541376	0.00537781	0.00174426	0.0019272	0.00593909	0.00566458	0.00972785	0.00999057	0.000217507	0.000247201	0.000106013	9.93e-05	0.000149394	0.000114533	7.56e-05	7.69e-05	0.000131973	0.000127897	0.000141346	0.000145353	0.000104024	9.54e-05	0.000262816	0.000251702
1,3-Cyclopentadiene, 5,5-dimethyl-1-ethyl-	1e-14	5.75e-06	5.12e-07	3.64e-06	1.36e-05	3.98e-06	1.12e-05	1e-14	0.000133337	0.000159388	0.000139376	0.000134373	0.000117999	7.93e-05	0.000231314	0.000229388	3.42e-06	1.83e-06	1e-14	1.59e-06	1e-14	2.49e-06	3.01e-06	1.01e-06
Butanoic acid, 2-methyl-, ethyl ester	0.00284851	0.00328741	0.00125359	0.00155483	0.0031587	0.003149	0.00887553	0.00969806	0.000100539	0.000111712	0.000123973	0.000125743	0.00207487	0.00213605	4.78e-05	5.58e-05	0.0017286	0.00173427	0.00940747	0.00941424	0.00344356	0.00333651	2.56e-05	3.74e-05
2-Cyclopenten-1-one, 3,5,5-trimethyl-	7.77e-06	2.88e-06	1.02e-06	1e-14	8.74e-06	5.3e-06	1.09e-05	1e-14	6.99e-05	7.35e-05	5.54e-05	3.94e-05	2.52e-05	2.68e-05	0.000601864	0.000596311	1e-14	1e-14	1e-14	1.43e-06	1e-14	1.61e-06	2.21e-06	4.45e-06
1-Hexanol	0.0112849	0.016341	0.00825579	0.0111701	0.011531	0.015407	0.0943797	0.105493	0.000746624	0.000817834	5.68e-05	7.29e-05	0.00085081	0.000889379	0.000286578	0.000296616	0.00109617	0.00109163	0.00104769	0.00129921	0.000846226	0.000694732	0.00594401	0.00569935
1-Butanol, 3-methyl-, acetate	0.0312365	0.0344487	0.0196806	0.023551	0.0347188	0.0351314	0.00621279	0.005771	0.000186549	0.000210556	0.000276756	0.000303083	0.00179527	0.00530856	0.000442359	0.000476109	0.00721082	0.00757645	0.00478607	0.00515893	0.00608656	0.00582171	0.000603352	0.000572013
1-Butanol, 2-methyl-, acetate	0.0216817	0.0236864	0.0144503	0.0174002	0.0235458	0.0232595	0.00554335	0.00533798	0.000115129	0.0001274	0.000161077	0.000177583	0.000981307	0.00273998	0.000285916	0.000267052	0.00558126	0.00566878	0.0065254	0.00669677	0.00549636	0.00509599	0.000420733	0.000440191
2-Heptanone	0.00334617	0.00328123	0.00248773	0.00299452	0.00381551	0.00350064	0.00343089	0.00332654	0.0136896	0.0146959	0.00874558	0.00919903	0.00915899	0.00888209	0.0100903	0.0100939	0.000427225	0.000442371	0.000455284	0.000431338	0.00034957	0.000380604	0.000331231	0.000329351
2-n-Butyl furan	6.66e-05	4.37e-05	3.42e-05	0.000192599	7.08e-05	4.27e-05	0.000122913	0.000104883	9.24e-05	9.31e-05	7.94e-05	8.47e-05	0.000198619	0.000200516	0.000590364	0.000578977	8.14e-06	5.29e-06	6.44e-06	3.92e-06	7.77e-06	5.66e-06	1.56e-05	2.97e-06
2,4-Dimethylfuran	4.38e-05	1.61e-05	3.16e-05	1.46e-05	2.81e-05	4.35e-05	0.000373283	0.000367566	1.31e-05	1.97e-05	1.2e-05	1.06e-05	1e-14	1.65e-05	6.24e-05	7.18e-05	1e-14	1e-14	1e-14	6.89e-06	2.46e-06	4.73e-06	1.81e-05	2.05e-05
2-Butenoic acid, 2-methyl-	0.00115951	0.00114483	0.000938678	0.00111873	0.00142578	0.00126751	0.00136772	0.00121759	0.000368438	0.000579519	0.000442885	0.000572558	0.000778246	0.000505477	0.00110577	0.00112612	0.000177171	0.000209684	0.00021128	0.000199866	0.000187594	0.000182639	0.000216759	0.000209538
Heptanal	0.000310144	0.000215227	0.000169614	0.000158664	0.000274184	0.000205432	0.00237965	0.00230585	0.000130149	0.000133773	0.000192819	9.75e-05	0.000170897	0.000173075	0.0307277	0.0308297	1.44e-05	1.55e-05	2.75e-05	1.62e-05	1.89e-05	2.66e-05	0.000173247	0.000146056
Ethanone, 1-(2-furanyl)-	0.000766239	0.00080287	0.000566688	0.000498716	0.00074952	0.00082184	0.00103363	0.00101984	7.76e-05	8.16e-05	0.000176231	0.000179954	5.28e-05	4.09e-05	9.83e-05	9.21e-05	0.000185903	0.0001907	0.000287231	0.000297016	0.000188596	0.00019079	0.000446439	0.000417524
Hexanoic acid, methyl ester	0.00425512	0.00437729	0.0017533	0.00201456	0.00414036	0.00395239	0.00368092	0.00381912	0.0894745	0.092863	0.0724551	0.0756464	0.0491635	0.0483094	0.000445751	0.00048429	0.000289199	0.000301547	0.00170248	0.00181343	0.000416446	0.000400469	5.68e-05	4.27e-05
Oxepine, 2,7-dimethyl-	7.75e-05	2.06e-05	3.39e-05	3.46e-05	4.45e-05	3.43e-05	4.82e-05	3.05e-05	0.000310873	0.00033961	0.000218574	0.000241093	0.000353344	0.000349476	0.000241573	0.000250123	1.34e-05	1.75e-05	1.73e-05	1.21e-05	1.15e-05	2.38e-05	1.21e-05	1.24e-05
.alpha.-Pinene	0.000368222	0.00021757	0.000518312	0.000503867	0.000272902	0.000206206	0.000800184	0.00062171	1e-14	1e-14	4.47e-05	4.54e-05	0.000167402	0.00016731	5.14e-05	4.76e-05	0.0153103	0.0157625	0.0155675	0.014751	0.0178849	0.0160274	0.0179628	0.0187596
2-Heptanone, 6-methyl-	0.000313491	0.000264215	0.000195807	0.000247843	0.000416517	0.000300689	0.000394639	0.000311171	0.00399256	0.00435071	0.00319274	0.00322257	0.00289363	0.0028574	0.00486901	0.00474594	4.38e-05	5.4e-05	5.86e-05	5.09e-05	4.36e-05	4.8e-05	3.49e-05	2.53e-05
2-Heptenal, (Z)-	0.00382861	0.00228656	0.00252552	0.00228876	0.00223633	0.00245226	0.00915441	0.00986292	0.000559462	0.000633506	0.000446003	0.000499385	0.000444983	0.000458688	0.0203601	0.0198756	3.84e-05	5.57e-05	6.84e-05	5e-05	5.82e-05	5.86e-05	8.19e-05	8.78e-05
3-Ethylcyclopentanone	7.44e-05	7.69e-05	6.21e-05	6.63e-05	8.2e-05	6.45e-05	0.000161764	0.000227897	0.000459352	0.000481043	0.000331447	0.000342161	0.000267925	0.000255399	0.000639506	0.00062709	2.03e-06	5.75e-06	6.76e-06	1.33e-05	6.87e-06	8.3e-06	2.58e-05	3.58e-05
Benzaldehyde	0.00239166	0.00183833	0.00203895	0.00218029	0.00266403	0.00206339	0.0902821	0.0891066	5.94e-05	5.44e-05	0.000113185	8.68e-05	8.17e-05	0.000113757	0.004665	0.00476757	0.000139018	0.000153751	0.000173384	0.000161951	0.000169496	0.000174391	0.00117725	0.00116757
1-Hepten-6-one, 2-methyl-	0.000246021	0.000236314	0.00015656	0.000204112	0.000293751	0.000239579	0.000489948	0.000437558	0.00193764	0.00202197	0.00132915	0.00134111	0.00132565	0.00129834	0.00221229	0.00218712	2.63e-05	3.71e-05	4.14e-05	3.88e-05	3.18e-05	3.9e-05	3.01e-05	2.87e-05
1-Butanol, 3-methyl-, propanoate	5.17e-05	5.01e-05	3.14e-05	3.6e-05	5.09e-05	6.09e-05	8.78e-05	0.000111208	0.0019827	0.00204845	0.00296724	0.00328742	0.000212125	0.00022064	0.000209391	0.000322374	6.95e-06	9.72e-06	1.56e-05	1.04e-05	1.23e-05	5.81e-06	1.7e-05	2.08e-05
Bicyclo[3.1.0]hexane, 4-methylene-1-(1-methylethyl)-	2.17e-05	7.67e-06	3.07e-05	2.76e-05	1.68e-05	2.49e-05	3.78e-05	4.05e-05	6.44e-06	1.18e-05	8.42e-06	6.2e-06	4.27e-06	1.05e-05	1.24e-06	1.17e-05	0.00174576	0.00164164	0.00293248	0.00331983	0.00371147	0.00312849	0.018986	0.0172585
1-Octen-3-one	0.00420902	0.0021871	0.00248244	0.00211868	0.00213453	0.00240706	0.00453108	0.00482115	0.000137873	0.000137633	0.000165692	0.000138688	0.000180671	0.000160602	0.00262206	0.00256231	5.55e-05	6.19e-05	8.45e-05	9e-05	0.000181177	0.000143593	0.000515858	0.000516019
1-Octen-3-ol	0.00131873	0.00132779	0.000899175	0.000890175	0.00108567	0.0013473	0.00134852	0.00115108	0.00728606	0.00658692	0.00636078	0.00655108	0.0047091	0.00463145	0.0188184	0.0192311	3.14e-05	2.41e-05	3.26e-05	2.8e-05	4.18e-05	4.23e-05	3.61e-05	4.27e-05
.beta.-Pinene	0.000230692	0.000172629	0.000145469	0.000175227	0.000231786	0.000173496	0.000433604	0.000352387	1.09e-05	1.53e-05	9.66e-05	0.000109273	0.000196783	0.000207446	0.000103082	0.000104812	0.00275689	0.00280421	0.00298257	0.00276292	0.00382822	0.00350177	0.00612268	0.00578185
Pentanoic acid	0.00355883	0.00365013	0.00263635	0.00229331	0.00390974	0.00387084	0.00345838	0.00280876	0.00163057	0.00168929	0.00193312	0.00184056	0.00176411	0.00151959	0.00260526	0.0023415	0.000272529	0.000283989	0.000314466	0.000259153	0.00038757	0.000374992	0.000109049	0.000115765
5-Hepten-2-one, 6-methyl-	0.0416141	0.0390711	0.0289562	0.0314359	0.0368985	0.036424	0.0690675	0.0684698	0.039252	0.0398697	0.0418636	0.0426474	0.0351176	0.0344385	0.0606905	0.0594594	0.000232242	0.000190598	0.000241523	0.000226593	0.000260385	0.000230813	0.000568207	0.000525261
2-Octanone	0.00523122	0.0048546	0.00398217	0.00438149	0.00514461	0.00504276	0.0033892	0.0032129	0.0554792	0.0567035	0.0386496	0.039027	0.0402588	0.0396128	0.0106876	0.010747	0.00191723	0.00195479	0.00204704	0.00199193	0.00186852	0.00181771	0.00238382	0.00246932
.beta.-Myrcene	0.0113039	0.00835276	0.0128355	0.0135363	0.00946015	0.00839289	0.00834002	0.00696256	0.00935679	0.00946073	0.00768557	0.00770598	0.00846255	0.00835173	0.00345714	0.00358499	0.0440933	0.0456436	0.0461236	0.0462564	0.0434247	0.0418418	0.0565257	0.0578558
Heptane, 2,2,4,6,6-pentamethyl-	0.00133838	0.00115963	0.00106751	0.00123063	0.000997148	0.00112408	0.000643646	0.000513453	0.00350108	0.00361916	0.00269074	0.00271	0.00285643	0.002862	0.00111802	0.00117845	1e-14	1e-14	4.81e-05	2.72e-05	1e-14	5.08e-06	1e-14	1e-14
Furan, 2-pentyl-	0.00201653	0.00169573	0.00190807	0.00200143	0.00194409	0.00170026	0.00251904	0.00191309	0.0243115	0.0256771	0.0253116	0.02584	0.0438611	0.0443	0.029797	0.0304042	0.000873203	0.000892682	0.00102457	0.0010329	0.000943081	0.000879666	0.00111673	0.00113654
2H-Pyran-2,6(3H)-dione	0.00928069	0.00567408	0.00657808	1e-14	0.00867731	0.0067481	0.00772682	0.00439308	3.68e-06	1.1e-05	1.16e-05	1.71e-05	1.85e-05	1.16e-05	1e-14	4.13e-06	4.47e-06	1.22e-06	1.14e-05	1e-14	5.14e-05	7.15e-05	6.43e-06	8.01e-05
Cyclohexene, 1,5,5-trimethyl-3-methylene-	6.61e-05	4.22e-05	4.12e-05	3.33e-05	5.7e-05	4.87e-05	1.67e-05	2.66e-05	0.00277156	0.00311054	0.00342603	0.00342988	0.00362206	0.00339874	0.00117295	0.00122081	0.00134255	0.0012581	0.00047629	0.000145247	0.00141989	0.00136174	0.001748	0.00187653
Hexanoic acid, ethyl ester	0.00713332	0.00657897	0.00605192	0.00706666	0.00696105	0.00682977	0.00395298	0.00403363	0.000670055	0.000699013	0.0012305	0.00131826	0.0426622	0.0425645	0.000177539	0.000223151	0.00162808	0.00178796	0.0077252	0.00837726	0.00244127	0.00249101	6.49e-05	5.67e-05
.alpha.-Phellandrene	0.00116102	0.000847598	0.00145051	0.00149918	0.000925632	0.000830459	0.000816883	0.000672307	0.000185752	0.000205531	0.000208409	0.000192534	0.000245238	0.000222858	0.00020724	0.000205088	0.00315202	0.00321213	0.00407269	0.00401106	0.00324133	0.00306729	0.00352472	0.00354055
Propanoic acid, 2-methyl-, 3-methylbutyl ester	0.00480297	0.00418996	0.00266084	0.00290766	0.00460638	0.00439353	0.00489335	0.00504156	0.00161635	0.00179162	0.00352737	0.00381397	0.00194141	0.00210878	0.000329267	0.000355178	0.000782559	0.000809775	0.00100985	0.00102685	0.000752379	0.000744077	0.000677323	0.000657892
2,4-Heptadienal, (E,E)-	0.000122093	0.000119488	0.000111597	0.000109378	0.000121601	0.000111722	0.00594822	0.00642644	0.000112922	0.0001274	8.14e-05	8.3e-05	9.17e-05	9.06e-05	0.01043	0.0102464	7e-05	7.76e-05	0.000101338	9.59e-05	9.41e-05	8.33e-05	0.000265493	0.000269579
Propanoic acid, 2-methyl-, 2-methylbutyl ester	0.00113932	0.00109105	0.000625558	0.00105136	0.00120692	0.00116397	0.000954905	0.000733655	0.00127635	0.00134147	0.00292839	0.00310716	0.00150697	0.0015166	2.98e-05	2.19e-05	9.45e-05	8.09e-05	0.000310349	0.000319924	0.000103171	0.000100593	7.11e-05	6.54e-05
Phenol, 4-methoxy-3-methyl-	3.67e-06	9.37e-06	1.03e-05	1.65e-05	3.26e-06	1e-14	4.88e-06	1.05e-05	0.000534143	0.000573268	0.000338493	0.000354498	0.000382666	0.000370431	0.000611874	0.000633813	2.16e-05	2.57e-05	2.93e-05	2.25e-05	2.29e-05	2.7e-05	2.74e-05	2.13e-05
Heptanoic acid, methyl ester	0.000134939	0.000122576	5.62e-05	6.81e-05	0.000121484	0.000109954	7.66e-05	8.08e-05	0.033959	0.0350705	0.0345532	0.036414	0.0183269	0.0185074	8.63e-05	0.000110968	2.39e-05	2.09e-05	5.89e-05	5.44e-05	1.62e-05	2.47e-05	1.98e-05	1.51e-05
o-Cymene	0.00937785	0.0079648	0.0102378	0.011805	0.00873742	0.00792533	0.0101294	0.00918998	0.00790419	0.00855362	0.0235547	0.0243463	0.0260811	0.0265172	0.0253386	0.0256948	0.000711611	0.000709209	0.00107878	0.00100639	0.000784013	0.000773997	0.00135598	0.00140052
Cyclohexene, 4-methyl-1-(1-methylethenyl)-	0.0467615	0.0405325	0.0414388	0.0471477	0.0448205	0.0402521	0.0436706	0.039303	0.0155391	0.0160926	0.0154482	0.0154993	0.0190158	0.0187355	0.0160902	0.016604	0.0288862	0.0294736	0.0305815	0.0310876	0.0295834	0.0283637	0.0390598	0.0395243
D-Limonene	0.133179	0.119246	0.1188	0.132792	0.132482	0.117855	0.128435	0.116529	0.0489234	0.0499954	0.0482769	0.0482771	0.0577376	0.0561572	0.0503102	0.0515409	0.0970637	0.0999675	0.103536	0.103847	0.0998512	0.0952221	0.131	0.131713
Cyclohexanone, 2,2,6-trimethyl-	0.00251581	0.000262724	0.00289316	0.00327933	0.000286996	0.000284224	0.0010651	0.00100319	0.015068	0.0160951	0.0123347	0.0126615	0.0129733	0.0123459	0.0154545	0.0152843	0.0021898	0.00226601	0.00237343	0.00235709	0.00221252	0.00216536	0.00295383	0.00301523
3-Octen-2-one	0.000923308	0.000482744	0.000882026	0.000971072	0.000603111	0.000408433	0.00148757	0.0013696	0.00498624	0.00537855	0.00418502	0.00436082	0.00432188	0.0042017	0.0264056	0.0264406	1e-14	1e-14	1e-14	1e-14	1e-14	1e-14	1e-14	1e-14
Benzeneacetaldehyde	0.000623311	0.000381999	0.000822303	0.000814024	0.000402423	0.000378155	0.00792914	0.00788068	0.000536779	0.000558255	0.000820666	0.000871447	0.00116784	0.00102941	0.00217109	0.00214314	1e-14	1e-14	1e-14	1e-14	1e-14	1e-14	1e-14	1e-14
cis-2,6-Dimethyl-2,6-octadiene	0.00651055	0.00333267	0.00372067	0.00322691	0.00325747	0.0036286	0.00646804	0.00757004	8.32e-05	9.51e-05	9.73e-05	6.99e-05	6.12e-05	0.000104499	0.000945691	0.000975222	1e-14	1e-14	1e-14	1e-14	1e-14	1e-14	1e-14	1e-14
2-Cyclohexen-1-ol, 2,4,4-trimethyl-	4.57e-05	2.49e-05	3.48e-05	2.51e-05	2.45e-05	2.59e-05	2.9e-05	2.69e-05	0.00142275	0.00134992	0.00120013	0.00113278	0.000945943	0.000768027	0.00263678	0.00270381	3.38e-05	3.25e-05	9.66e-06	7.95e-06	1.59e-05	3.07e-05	3.15e-05	2.39e-05
.beta.-Ocimene	3.97e-05	2.55e-05	2.7e-05	2.02e-05	3.97e-05	1.91e-05	0.000115416	6.22e-05	4.98e-05	4.98e-05	3.44e-05	4.08e-05	3.53e-05	3.59e-05	0.000146846	0.000248746	0.0293853	0.0303066	7.9e-05	6.6e-05	0.0339184	0.0304072	0.0545365	0.0537577
Benzene, 2-methoxy-1,3-dimethyl-	0.00409978	0.00272852	0.00514507	0.0052451	0.00288743	0.00251072	0.00236965	0.00195346	0.00032669	0.000359465	0.000599473	0.000583679	0.000782155	0.000719353	0.000468916	0.000492147	2.59e-05	2.01e-05	4.71e-05	3.49e-05	2.83e-05	2.83e-05	3.28e-05	2.23e-05
.gamma.-Terpinene	0.0115483	0.00769643	0.0144144	0.01478	0.00839742	0.00710117	0.00684996	0.00576995	0.00101998	0.00109071	0.0018059	0.00179024	0.00220803	0.00216338	0.00246975	0.00253469	0.000121008	0.000112832	0.00033885	0.000310379	0.000137311	0.000157406	0.000156645	0.000168183
1H-Pyrazole, 4,5-dihydro-5,5-dimethyl-4-isopropylidene-	0.000255845	0.000230989	0.000197343	0.000195729	0.000218392	0.000218141	0.000507783	0.000694759	0.010524	0.0108343	0.00842168	0.00853513	0.00825652	0.00805165	0.0139223	0.0136272	1.55e-05	1.33e-05	2.15e-05	1.72e-05	1.19e-05	1.05e-05	3.86e-05	3.12e-05
(E)-Hex-3-en-1-yl propyl carbonate	8.88e-05	6.24e-05	7.46e-05	7.98e-05	7.28e-05	8.46e-05	8.19e-05	8.71e-05	0.000169261	0.000176546	0.000136258	0.000141179	0.000158753	0.000153395	0.000422504	0.000398351	0.00196669	0.001964	2.65e-05	1.96e-05	0.00209988	0.00191337	0.00255419	0.00261065
o-Toluic acid, 2-chlorophenyl ester	1.46e-05	1.34e-05	1.02e-05	1.12e-05	3.04e-05	1.92e-05	0.000487335	0.000489209	8.83e-06	9.19e-06	3.93e-06	7.11e-06	1e-14	6.65e-07	0.0028264	0.0028569	5.95e-06	8.4e-06	4.12e-06	4.14e-06	1.14e-05	6.15e-06	7.23e-06	1.98e-05
Acetophenone	1.74e-05	2.64e-05	2.45e-05	1.93e-05	1.77e-05	1.41e-05	8.07e-06	2.42e-06	1.83e-05	1.57e-05	1.25e-05	2.25e-05	1.15e-05	2.72e-05	2.18e-05	2.66e-05	0.00222245	0.00238149	0.00031758	0.000174625	0.0039334	0.00365147	0.000215621	0.000208391
cis-Linaloloxide	0.0023188	0.0024888	0.00188819	0.00208606	0.00250923	0.00255437	0.00288209	0.00295233	0.000546588	0.000553904	0.000259483	0.000268016	0.000287355	0.000294538	0.000391894	0.000396569	2.53e-06	1e-14	2.42e-05	4.09e-05	2.41e-06	6.74e-06	6.02e-06	7.08e-06
1-Octanol	0.000108599	0.000113205	8.38e-05	9.92e-05	9.38e-05	0.000116474	0.000145292	0.000130392	9.83e-05	8.72e-05	7.75e-05	7.75e-05	0.000259692	0.000258005	0.000287985	0.000277096	0.00642658	0.0104803	0.0106187	0.0110555	0.0163918	0.0162654	0.0303203	0.0292699
trans-Linalool oxide (furanoid)	0.000120798	9.9e-05	7.5e-05	8.51e-05	0.000111817	0.000119679	0.000155743	0.000121749	3.49e-05	4.95e-05	3.44e-05	2.94e-05	2.75e-05	1.95e-05	2.85e-05	1.56e-05	0.000461706	0.000475605	0.000119389	6.12e-05	0.000651063	0.00064324	0.00062899	0.000573362
endo-2-Methylbicyclo[3.3.1]nonane	6.02e-05	5.05e-05	5.27e-05	5.88e-05	5.52e-05	3.48e-05	8.42e-05	8.63e-05	0.000895654	0.000940148	0.000681726	0.00068882	0.000653257	0.000608368	0.00319025	0.0031152	5.82e-05	4.87e-05	3.02e-05	2.82e-05	4.48e-05	4.04e-05	0.000101016	9.41e-05
5-Isopropyl-2-methylbicyclo[3.1.0]hexan-2-ol	5.52e-05	4.52e-05	0.000109123	9.55e-05	5.67e-05	3.66e-05	5.57e-05	6.49e-05	0.000260481	0.000276921	0.000256552	0.000242734	0.000234457	0.000212103	6.81e-05	6.37e-05	0.000129095	8.83e-05	0.000124826	0.000131936	8.34e-05	8.88e-05	0.000109919	0.000100451
Cyclohexanol, 1-methyl-4-(1-methylethenyl)-, cis-	0.000154263	0.000135249	0.000272167	0.000211283	0.00012626	0.000128409	9.76e-05	0.000137982	0.000812955	0.000824759	0.000743526	0.000718417	0.000798149	0.000735984	0.000664739	0.000618504	0.0010092	0.000722085	0.00092334	0.00095378	0.000710369	0.000698051	0.000797551	0.000824794
Cyclohexene, 1-methyl-4-(1-methylethylidene)-	0.0075838	0.005617	0.00872692	0.00884883	0.00655466	0.00531306	0.00414553	0.00348339	0.000670055	0.000710411	0.00698046	0.00694879	0.00584401	0.00575194	0.00510637	0.00539555	0.00024415	0.000246022	0.000169795	0.000410975	0.00038762	0.000338142	0.000363966	0.000344935
2-Nonanone	0.000415613	0.000302341	0.000298275	0.00029218	0.000308311	0.000288202	0.000215155	0.000214194	0.026633	0.0264801	0.0253373	0.0254729	0.0244405	0.0233427	0.0295321	0.0300999	0.000618337	0.000610322	0.000573881	0.000548426	0.000631562	0.00059043	0.000830487	0.000823984
Benzene, 1-methyl-3-(1-methylethenyl)-	0.001697	0.00112108	0.00180501	0.00181944	0.00137604	0.00122928	0.00127287	0.00120389	0.0029095	0.00291475	0.00427295	0.00412034	0.00414594	0.00401842	0.00387823	0.00400845	2.46e-05	2.5e-05	0.00139024	0.00214863	3.37e-05	2.91e-05	3.94e-05	3.34e-05
3,5-Octadien-2-one	8.58e-05	9.68e-05	8.83e-05	8.79e-05	9.75e-05	8.72e-05	0.000233103	0.000203336	0.00148105	0.00141261	0.000866376	0.000889194	0.000905781	0.000911887	0.00328084	0.00324399	3.27e-05	2.87e-05	2.99e-05	2.12e-05	2.95e-05	3.41e-05	9.88e-05	9.47e-05
Benzoic acid, methyl ester	0.00154867	0.00142651	0.00246077	0.00262326	0.00145292	0.00142156	0.00255391	0.00257032	3.7e-05	3.57e-05	4.68e-06	1.42e-05	1.26e-05	2.03e-05	5.46e-06	1.02e-05	5.7e-05	6.93e-05	0.000255088	0.000412513	0.000126032	4.86e-05	0.0001458	0.000142076
Linalool	0.00286406	0.00235323	0.00251034	0.00256347	0.00221001	0.00219058	0.00131876	0.00131889	0.0194277	0.0201469	0.00584587	0.00546528	0.00528447	0.00491628	0.00831259	0.00837621	0.0236528	0.0233035	0.0326729	0.0348049	0.020208	0.0228378	0.0336053	0.0328271
6-Methyl-3,5-heptadiene-2-one	0.00409417	0.00380956	0.00353886	0.00391125	0.00352572	0.00352705	0.0061101	0.00640526	0.00235555	0.00231287	0.00124559	0.00124764	0.0012763	0.00129923	0.00216795	0.00215877	0.00226358	0.00230138	0.00316144	0.00322422	0.00274773	0.00268541	0.00355946	0.00350534
2,3,5-Trimethylanizole	1.3e-06	3.83e-06	1e-14	2.73e-06	1e-14	4.97e-06	5.79e-06	1e-14	0.00235187	0.00250645	0.00244329	0.00237696	0.00227272	0.00215972	0.00432374	0.00422982	4.48e-05	4.43e-05	5.81e-05	6.25e-05	5.01e-05	5.21e-05	7.21e-05	6.94e-05
Cyclohexanol, 2,6-dimethyl-	8.87e-05	8.05e-05	8.78e-05	9.73e-05	9.47e-05	8.88e-05	0.000110758	8.22e-05	0.00685037	0.00715167	0.0038219	0.00363426	0.00336314	0.00315044	0.013173	0.0130105	4.82e-05	6.79e-05	0.000110522	0.000112316	0.00015566	0.000114357	0.00011166	8.18e-05
(2R,4R)-4-Methyl-2-(2-methylprop-1-en-1-yl)tetrahydro-2H-pyran	3.44e-05	2.69e-05	3.59e-05	2.07e-05	4.1e-05	2.13e-05	2.87e-05	3.55e-05	8.32e-05	8.39e-05	3.13e-05	2.85e-05	3.97e-05	3.86e-05	2.79e-05	2.63e-05	0.00038287	0.00039962	0.000424249	0.000417816	0.000450636	0.000421603	0.00020471	0.000184644
Phenylethyl Alcohol	0.000616942	0.004976	0.0637194	0.0704914	7.48e-05	0.00291639	7.05e-05	8.66e-05	0.014036	0.0116952	0.00883064	0.00680378	0.00251316	0.00260677	0.000110693	0.000108619	0.00183149	0.00224046	0.00135223	0.00128224	0.00137462	0.00144301	0.00220548	0.00221634
Octanoic acid, methyl ester	0.00747909	0.00585747	0.00431236	0.00482294	0.00645286	0.0055606	0.00162116	0.0015704	0.11008	0.102262	0.111742	0.115411	0.0996884	0.101194	0.00104563	0.00128836	0.0180777	0.0158496	0.0134568	0.0142318	0.0147385	0.0151055	0.00481543	0.00452092
p-Mentha-1,5,8-triene	0.00335448	0.00250541	0.00315211	0.00304441	0.00279786	0.00276853	0.00012882	0.00033394	0.00107019	0.00116958	0.00110865	0.00105638	0.00109255	0.00102082	0.000135264	0.000122956	0.00166687	0.00177478	0.00175695	0.00163573	0.00177196	0.00154829	0.00243704	0.00238999
3-Cyclohexene-1-carboxaldehyde, 1,3,4-trimethyl-	0.000349007	0.000355802	0.000141715	0.000179873	0.000363287	0.000365225	0.000441555	0.000356287	0.000279486	0.000268894	7.07e-05	7.58e-05	0.000102656	9.74e-05	0.000235451	0.000238298	0.000149238	0.000150799	0.000194073	0.000205965	0.000164332	0.000154868	0.000290932	0.000291774
Isogeranial	0.000644902	0.000587003	0.000886463	0.000892094	0.000621048	0.000596185	0.000351472	0.000391915	0.000238964	0.000227653	5.9e-05	5.79e-05	8.23e-05	8.29e-05	0.000167115	0.000167262	0.000164668	0.000155023	0.000226797	0.000244252	0.000122623	0.000139591	0.000251302	0.000251837
Bicyclo[3.1.1]heptan-2-one, 6,6-dimethyl-, (1R)-	0.00126713	0.00136825	0.00071173	0.000934613	0.00132386	0.00136244	0.00148404	0.00150515	5.84e-05	6.63e-05	3.25e-05	3.22e-05	4.19e-05	4.63e-05	0.000101676	8.69e-05	1.99e-05	3.02e-05	2.34e-05	3.14e-05	3.21e-05	3.42e-05	4.15e-05	3.7e-05
cis-p-mentha-1(7),8-dien-2-ol	0.000544291	0.00056826	0.000412517	0.000455288	0.000580631	0.000604252	0.000604796	0.000598836	0.000423857	0.000412839	0.000296088	0.000280171	0.000323726	0.000362837	0.000460808	0.000473274	0.00126987	0.00132202	0.00108142	0.00103354	0.00126553	0.00115114	0.00209416	0.00204444
1,3,8-p-Menthatriene	4.63e-05	3.83e-05	4.35e-05	2.67e-05	2.48e-05	1.49e-05	1.5e-05	1.14e-05	7.58e-05	8.53e-05	8.08e-05	8.61e-05	8.67e-05	8.38e-05	5.53e-05	6.22e-05	0.00322926	0.00332557	0.00268452	0.00260982	0.0032323	0.00294195	0.0053418	0.00530294
Furan, 2,3-dihydro-4-(1-methylethyl)-	0.000543751	0.000567728	0.00041209	0.000454783	0.000580048	0.000603699	0.000604228	0.000598309	0.000423551	0.000412532	0.000295776	0.000279867	0.00032343	0.000362559	0.000460395	0.000472869	0.00126962	0.00132177	0.00108115	0.00103327	0.00126528	0.00115089	0.00209382	0.00204411
Isoneral	0.000382364	0.000419379	0.000252288	0.000291675	0.000396133	0.000389095	0.000431332	0.000434079	0.000100171	9.74e-05	6.82e-05	6.5e-05	7.35e-05	8.69e-05	0.000117064	0.000123604	0.000133015	0.000125301	0.000160347	0.000169216	0.000126282	0.000118262	0.000197748	0.000198069
1,6,6-Trimethyl-8-oxabicyclo[3.2.1]octan-2-one	1e-14	6.28e-06	7.08e-06	5.96e-06	5.47e-06	1.55e-05	1.35e-05	1e-05	0.00190858	0.00188189	0.00169415	0.00174587	0.00161283	0.00164344	0.00298665	0.00306749	1e-14	4.83e-06	5.33e-06	8.38e-06	1.42e-05	3.47e-06	7.77e-06	3.37e-07
Hexanoic acid, 2-methylpropyl ester	5.17e-05	5.1e-05	4.85e-05	5.69e-05	5.33e-05	3.11e-05	3.26e-05	5.05e-05	0.00202555	0.00200616	0.00259214	0.00251163	0.00161087	0.00151804	1.06e-05	2.54e-05	7.51e-05	8.22e-05	0.000148313	0.000175261	0.000101016	9.15e-05	4.13e-05	3.74e-05
p-Menth-8-en-1-ol, stereoisomer	0.0076965	0.00717514	0.0111042	0.0123923	0.00588411	0.00623137	0.00458107	0.00500414	0.000953096	0.000935797	0.00101666	0.000959631	0.000703075	0.000636863	0.000368647	0.000364088	0.00784042	0.00844689	0.00772884	0.0086318	0.00711407	0.00655501	0.0121879	0.0118721
Cyclohexanol, 2-methyl-5-(1-methylethenyl)-, (1.alpha.,2.alpha.,5.beta.)-	0.00318521	0.0030659	0.00475141	0.00544023	0.00246148	0.00259426	0.00195661	0.00210747	9.5e-05	9.92e-05	4.22e-05	3.65e-05	4.77e-05	4.76e-05	4.65e-05	3.7e-05	0.00338589	0.00377649	0.0033173	0.00374003	0.00303067	0.00287742	0.00536175	0.00501582
Cyclohexanol, 1-methyl-4-(1-methylethenyl)-	0.0076965	0.00717514	0.0111042	0.0123923	0.00588411	0.00623137	0.00458107	0.00500414	0.000953096	0.000935797	0.00101666	0.000959631	0.000703075	0.000636863	0.000368647	0.000364088	0.00784042	0.00844689	0.00772884	0.0086318	0.00711407	0.00655501	0.0121879	0.0118721
10-Methylundec-3-en-4-olide	0.000148001	0.000134823	0.000158181	0.000214818	0.000143614	0.000119347	0.00013734	0.000129338	0.00273625	0.00271786	0.00167083	0.00169488	0.00184408	0.00177654	0.00682973	0.00689475	0.00020168	0.000256201	0.000252871	0.000208404	0.000269208	0.000254924	0.000300236	0.000285163
2-Nonenal, (E)-	0.000207375	0.000200425	0.000324382	0.000427615	0.000249957	0.000244773	0.00108861	0.00101015	0.000809092	0.000829355	0.000460845	0.000457147	0.000525011	0.000510133	0.00537168	0.00538875	0.000185357	0.000186018	0.000297576	0.000315523	0.000157514	0.000171804	0.000356133	0.000348173
Adamantane	0.000903553	0.000847598	0.00142337	0.00148342	0.000745327	0.000784378	0.000516303	0.000570164	3.14e-05	2.45e-05	1.53e-05	1.66e-05	1.76e-05	2.31e-05	2.13e-05	2.41e-05	0.000706253	0.000795627	0.000746104	0.000919683	0.000622789	0.000582181	0.00136944	0.00129082
4-Decen-6-yne, (Z)-	0.00058175	0.000528537	0.000871361	0.000881489	0.000458914	0.000506011	0.000353176	0.000384958	0.000115926	0.00011496	7.7e-05	7.52e-05	8.78e-05	7.51e-05	6.98e-05	8.08e-05	0.00212521	0.00230708	0.00226243	0.00236631	0.00224305	0.00220739	0.00090901	0.000870331
Benzoic acid, ethyl ester	0.00241725	0.00180861	0.00335098	0.0034798	0.00246066	0.00229578	0.00295332	0.00295043	0.000127819	0.000117472	5.71e-05	7.24e-05	6.84e-05	8.78e-05	1.51e-05	2.45e-05	0.00143721	0.00164347	0.00270447	0.00293563	0.00195981	0.00185168	0.000324938	0.000301152
Phenol, 4-ethyl-	0.00109592	0.000995201	0.0014953	0.00148979	0.000867627	0.000891791	0.00041202	0.000463278	0.000156142	0.000140452	0.000110752	9.15e-05	0.000126351	0.000150179	1.37e-05	2.5e-05	0.0384472	0.0426388	0.041953	0.0418347	0.0432911	0.0435388	0.00127746	0.00130964
Benzaldehyde, 2,4-dimethyl-	1e-14	1e-14	1.11e-05	5.55e-06	1e-14	1.11e-07	8.02e-05	7.09e-05	2.42e-05	2.4e-05	2.01e-05	1.15e-05	1.62e-05	8.37e-06	0.00617359	0.0060757	1.09e-06	4.02e-06	2.11e-06	2.92e-06	3.51e-06	5.47e-06	0.000410156	0.000403222
Bicyclo[3.1.1]heptan-3-one, 2,6,6-trimethyl-, (1.alpha.,2.alpha.,5.alpha.)-	0.00231588	0.00205047	0.00133635	0.00147039	0.0021619	0.00206073	0.00195105	0.00182908	0.000397435	0.000380177	0.000372106	0.000341493	0.000289132	0.000232171	0.00047057	0.000441523	5.89e-05	8.11e-05	0.000100705	9.61e-05	9.35e-05	7.98e-05	0.000592239	0.000491395
3-Cyclohexen-1-ol, 4-methyl-1-(1-methylethyl)-, (R)-	0.0178746	0.0165278	0.0249999	0.0281536	0.0138325	0.0139757	0.0104867	0.0108351	0.0101178	0.0101132	0.00501011	0.00495508	0.00512731	0.00479948	0.00687349	0.0067918	0.0498482	0.0486077	0.054389	0.0556669	0.0487908	0.0479376	0.0684028	0.0683977
Ethanone, 1-(4-methylphenyl)-	0.000211261	0.000178699	0.000274727	0.000300967	0.000195446	0.000184104	0.000235261	0.000255304	0.00736705	0.00719254	0.00616029	0.00608767	0.00555968	0.00602453	0.0108098	0.0105694	0.000276299	0.000307095	0.000349512	0.000343522	0.000329717	0.000321449	0.000427829	0.000401603
Benzenemethanol, .alpha.,.alpha.,4-trimethyl-	0.00090582	0.000861975	0.00114003	0.00123316	0.000802983	0.000822834	0.000667956	0.000724169	0.00982921	0.00955333	0.00978625	0.00796591	0.00880955	0.0068848	0.00930469	0.0093648	0.00203094	0.00236871	0.00292203	0.00272914	0.00222179	0.00232316	0.00366148	0.0033829
Acetaldehyde, (3,3-dimethylcyclohexylidene)-, (Z)-	5.1e-05	3.46e-05	7.35e-05	5.46e-05	3.51e-05	3.72e-05	9.66e-06	2.35e-05	0.000110225	0.000102459	4.93e-05	6.13e-05	4.4e-05	5.09e-05	4.97e-05	3.87e-05	0.000905601	0.00103035	0.00141309	0.00141275	0.00099973	0.000931597	0.000707982	0.000653575
Phosphonic dichloride, 1-adamantyl-	3.84e-05	4.53e-05	0.000172941	0.000140182	4.43e-05	1.25e-05	3.12e-05	3.25e-05	0.000129781	0.000146825	7.59e-05	0.000129754	0.000540353	0.00119107	0.000181593	0.0001428	0.00274518	0.00299038	0.00363831	0.00361425	0.00250885	0.00233629	0.00489007	0.00437999
Octanoic acid	0.000113781	9.34e-05	9.53e-05	9.68e-05	9.97e-05	0.000104871	5.26e-05	5.54e-05	0.00551045	0.000405976	0.00137474	0.000133522	0.00512944	0.000239544	3.78e-05	2.39e-05	0.00239223	0.00300056	0.00381275	0.00349949	0.00319521	0.00321493	0.000130605	0.000180597
2-n-Heptylfuran	2.79e-05	4.03e-05	3.58e-05	4.45e-05	1.96e-05	2.65e-05	1.94e-05	2.66e-05	0.00739347	0.0073686	0.00971909	0.00932386	0.00782771	0.00774214	0.00729186	0.0078801	0.000203317	0.00022429	0.000255246	0.000258517	0.000175813	0.000179369	0.000308872	0.000294675
Methyl salicylate	0.000278299	0.000212885	0.000428557	0.000453975	0.000267777	0.000261349	7.13e-05	5.54e-05	5.19e-05	4.31e-05	6.12e-05	6.06e-05	4.63e-05	4.46e-05	2.14e-05	2.2e-05	0.000619974	0.000708496	0.00290973	0.00297801	0.000876556	0.00081519	8.64e-05	8.55e-05
.alpha.-Terpineol	0.0565098	0.0559751	0.0584168	0.0663381	0.0542846	0.0544434	0.0456181	0.0458074	0.0051452	0.00511094	0.00186097	0.00184718	0.00155075	0.00142485	0.00204865	0.00207623	0.0248119	0.0248181	0.0321652	0.0300839	0.022163	0.0221159	0.0561764	0.0559793
Cyclohexanone, 2-methyl-5-(1-methylethenyl)-, trans-	0.000133104	9.14e-05	0.000194527	0.000170582	0.000122998	0.000125646	0.000235489	0.000202388	0.000104646	0.000101479	5.44e-05	6e-05	0.000100228	0.000133049	0.00134917	0.00138386	0.00181557	0.00199693	0.00249641	0.00252662	0.00219623	0.00200527	0.00708417	0.00725658
Acetic acid, octyl ester	0.000349331	0.000256441	0.000409957	0.000355908	0.000163765	0.000225324	0.000182552	0.000158959	0.00101642	0.000864529	0.000697379	0.000714466	0.00102017	0.00116795	0.000235947	0.00023441	0.0129733	0.0141205	0.0176708	0.0174033	0.016576	0.0159295	0.0204795	0.0197308
2,4-Nonadienal	0.000153507	9.33e-05	8.78e-05	9.7e-05	0.000113564	0.000116364	0.000765764	0.000721639	0.000493805	0.000474302	0.000463402	0.000341128	0.000312234	0.000306013	0.011257	0.011022	8.02e-05	8.66e-05	9.28e-05	8.38e-05	0.000112045	0.000107914	0.000212073	0.000204411
1-Cyclohexene-1-carboxaldehyde, 2,6,6-trimethyl-	0.000197227	0.000164536	0.000184289	0.00015119	0.00014012	0.000185983	0.000141089	0.000162859	0.000708431	0.000679649	0.000605771	0.00051707	0.000485322	0.000436069	0.00934142	0.00932592	0.000331023	0.000386439	0.000448105	0.000420149	0.000426372	0.000399444	0.00197132	0.00182168
Nonanoic acid, methyl ester	0.00103277	0.00065974	0.000572575	0.000585067	0.000830937	0.00068227	1.09e-05	1.08e-05	0.0120235	0.00925312	0.0130284	0.0132644	0.011544	0.0129464	3.03e-05	5.49e-05	0.00130921	0.0011384	0.000966039	0.00100193	0.00119489	0.00118911	0.00119211	0.00115664
Benzene, 2-methoxy-4-methyl-1-(1-methylethyl)-	7.87e-05	2.75e-05	5.14e-05	4.21e-05	6.53e-05	4.81e-05	4.23e-05	6.01e-05	0.0012815	0.00127914	0.00256788	0.0023724	0.00230311	0.00226899	0.00282094	0.00295191	5.95e-07	3.36e-06	1.74e-06	5.25e-06	1e-14	2.78e-06	1e-14	8.7e-06
Butanoic acid, 2-methyl-, hexyl ester	0.00509013	0.0033528	0.00227272	0.00228099	0.00360865	0.00306999	0.00408623	0.0036219	0.000264895	0.000255412	0.000112873	0.000106903	0.000168705	0.000170525	0.000315286	0.000295077	0.000413829	0.000392902	0.000510545	0.000525359	0.00039529	0.000397882	0.000651349	0.000651146
Benzeneacetic acid, ethyl ester	0.00260239	0.0022593	0.00214841	0.00244652	0.002673	0.0025642	0.00286699	0.00285261	0.000152402	0.000140023	5.21e-05	4.61e-05	0.000123448	0.000127672	7.56e-05	8.28e-05	0.000204905	0.000252944	0.000490013	0.000497731	0.000300741	0.000254143	0.000154369	0.000121972
Carvone	0.00095591	0.000843658	0.00174528	0.00195931	0.000701532	0.000692768	0.000719984	0.000720901	0.00525579	0.00529466	0.0010693	0.00106672	0.00171714	0.0016609	0.00235748	0.00232636	0.00223629	0.00261234	0.00214848	0.00219169	0.00210444	0.00197858	0.0228049	0.0212408
Isopentyl hexanoate	0.000161927	8.91e-05	8.42e-05	8.67e-05	0.000121251	0.000104429	7.94e-05	7.3e-05	0.0057675	0.00585285	0.0050673	0.00458855	0.00351614	0.00322013	5.93e-05	6.95e-05	0.000248714	0.000305364	0.000634631	0.000660848	0.000374636	0.000350539	0.000526569	0.000506574
Acetic acid, 2-phenylethyl ester	0.0026271	0.00235206	0.0049845	0.0056301	0.00251063	0.00250099	0.000162559	0.000177089	1.8e-05	1.36e-05	2.41e-05	2.08e-05	0.000202766	0.000324973	4.49e-05	3.33e-05	0.002281	0.00258018	0.00211765	0.00228704	0.00221713	0.00212988	1.43e-05	8.5e-06
2-Cyclohexen-1-one, 3-methyl-6-(1-methylethenyl)-, (S)-	0.000136343	0.00012428	0.00022217	0.000227543	0.000120203	0.000104097	9e-05	0.000118903	0.000453896	0.000447829	9.47e-05	9.19e-05	0.00011711	0.000103778	0.000149411	0.000151629	0.000187094	0.000184135	0.000167208	0.000185177	0.000220781	0.000210704	0.00803951	0.00749297
Phenol, 4-ethyl-2-methoxy-	0.00285477	0.00246516	0.00206711	0.00212151	0.0025012	0.00259415	1.36e-06	8.85e-06	0.00481722	0.0044941	0.0047096	0.00456958	0.00405442	0.00385211	8.91e-05	0.000156489	0.0547835	0.0538159	0.0537145	0.057801	0.0526535	0.051979	0.00047114	0.00128738
1-Cyclohexene-1-carboxaldehyde, 4-(1-methylethenyl)-	2.42e-05	1.97e-05	2.19e-05	2.02e-05	3.55e-05	1.94e-05	3.91e-05	3.03e-05	0.000136034	0.000132854	0.000126031	0.000116627	0.000116695	0.000118192	0.000127984	0.000125548	0.000377561	0.000433719	0.000473704	0.000482776	0.000472794	0.000458697	0.00281613	0.00264796
Isobornyl acetate	1.93e-05	2.55e-05	2.78e-05	2.53e-05	1.53e-05	1.91e-05	2.24e-05	2.93e-05	0.00109606	0.00109102	0.00174597	0.00168789	0.00164801	0.00160535	0.00227657	0.00228189	6.48e-05	6.9e-05	0.000152113	0.000127535	7.85e-05	6.85e-05	0.000144127	0.00013027
2-Undecanone	0.000227346	0.000151756	0.000237528	0.00017149	0.000185546	0.000144211	0.000306374	0.000286821	0.00459947	0.00445476	0.00475656	0.00437049	0.00389449	0.00358934	0.000556693	0.000550385	0.000536722	0.000690887	0.000447314	0.0003729	0.000582332	0.000455378	0.00133289	0.00125864
Nonanoic acid, ethyl ester	0.00103925	0.000562935	0.00137269	0.00129921	0.000810321	0.000675971	9.88e-06	1.99e-05	9.01e-06	6.62e-06	6.15e-05	8.15e-05	0.00807917	0.00864172	4.96e-06	8.75e-06	0.0162158	0.014404	0.0101202	0.0105432	0.0162954	0.0166277	0.00117624	0.00112851
4-Decenoic acid, methyl ester	1e-14	1e-14	1e-14	1e-14	1e-14	1e-14	1e-14	1e-14	0.00508285	0.00434066	0.00295446	0.00290922	0.00298006	0.0031174	1e-14	1e-14	1e-14	1e-14	1e-14	1e-14	1e-14	1e-14	1e-14	1e-14
2,4-Decadienal, (E,E)-	5.42e-05	3.56e-05	4.49e-05	5.92e-05	6.9e-05	2.9e-05	0.0103603	0.00984911	0.000163927	0.000257618	0.000120543	9.2e-05	0.000102419	0.00010899	0.0491357	0.0488993	0.000107067	0.000127999	0.000149527	0.000149277	0.000128939	0.000132709	0.00314863	0.0029703
trans-Geranic acid methyl ester	0.00010169	4.66e-05	3.86e-05	5.27e-05	5.24e-05	5.97e-05	3.41e-05	2.66e-05	7.49e-05	5.99e-05	7.67e-05	7.48e-05	8.49e-05	7.65e-05	6.65e-05	7.36e-05	0.000874741	0.000984647	0.00122794	0.00118329	0.00122437	0.00125529	0.00178575	0.00165593
Decanoic acid, methyl ester	0.00182254	0.0010312	0.00106393	0.000909465	0.00122358	0.000969919	0.000386347	0.00030316	0.0231659	0.0195787	0.0355797	0.035967	0.031878	0.0347727	2.15e-05	8.96e-05	0.011424	0.009498	0.0081219	0.00828743	0.008685	0.00918937	0.0105315	0.0101486
.alpha.-Terpinyl acetate	5.2e-05	0.00012673	5.19e-05	8.5e-05	6.24e-05	0.000106308	9.74e-05	0.000145677	0.000245646	0.000244259	0.000190013	0.000181716	0.000199863	0.000188043	0.000195244	0.000186054	0.00129026	0.00141211	0.00122123	0.00120662	0.00169295	0.00165557	0.00159691	0.00150954
n-Caprylic acid isobutyl ester	2.53e-05	2.04e-05	2.41e-05	2.67e-05	2.13e-05	2.45e-05	2.66e-05	2.72e-05	0.00109078	0.000932426	0.00227604	0.00228598	0.00144975	0.00159726	8.69e-06	1.02e-05	0.000671573	0.000527517	0.000174017	0.000169269	0.000360047	0.000397394	0.00028658	0.000249543
Eugenol	0.0012205	0.00103567	0.000686902	0.0006695	0.0010562	0.00107534	0.000105873	0.00011437	6.19e-06	5.64e-06	1.23e-05	4.68e-06	8.29e-06	7.76e-06	1.65e-06	2.35e-06	0.00395526	0.00390968	0.00340903	0.00336591	0.00376014	0.00388209	0.000225663	0.00023288
6-Octen-1-ol, 3,7-dimethyl-, acetate	0.000105576	8.63e-05	7.53e-05	7.82e-05	8.74e-05	8.02e-05	6.07e-05	4.87e-05	0.000484793	0.000464375	0.000613441	0.00058216	0.00041495	0.000435404	0.000117394	0.00011761	0.00795111	0.00823201	0.0105249	0.0102387	0.00907924	0.00900668	0.00732276	0.0069105
Naphthalene, 1,2,3,4-tetrahydro-1,1,6-trimethyl-	1.1e-05	1.02e-05	1e-14	5.45e-06	1.05e-05	1.99e-06	4.77e-06	9.17e-06	0.00197449	0.00183342	0.0018871	0.00173955	0.00156668	0.00162254	0.00212526	0.00218647	2.71e-05	3.13e-05	1.69e-05	2.47e-05	2.89e-05	2.61e-05	4.72e-05	4.09e-05
2(3H)-Furanone, dihydro-5-pentyl-	0.000604852	0.000540465	0.000563531	0.000603146	0.000582727	0.000550214	0.000179485	0.000190898	0.00885312	0.0084859	0.00362484	0.00322616	0.00534151	0.00505033	0.000103165	9.03e-05	0.000150131	0.000146524	0.000152113	0.000151716	0.000156211	0.000164678	0.000470873	0.00046097
2,6-Octadien-1-ol, 3,7-dimethyl-, acetate, (Z)-	4.29e-05	2.09e-05	3.95e-05	3.43e-05	5.22e-05	2.2e-05	1.99e-05	2.26e-05	0.000188388	0.000160736	9.08e-05	0.000105444	0.000124455	0.000163706	5.87e-05	6.06e-05	0.00435828	0.00459197	0.00462884	0.00440088	0.00474022	0.00480319	0.0110972	0.0109134
Copaene	1.09e-05	8.2e-06	1.07e-05	1e-14	2.33e-06	4.86e-06	7.04e-06	1.48e-06	0.000101274	9.99e-05	0.00010751	9.18e-05	7.62e-05	7.78e-05	0.000111603	0.00012166	0.00173038	0.00186145	0.00135091	0.00125801	0.00192321	0.00189599	0.00355618	0.00370584
Geranyl acetate	0.000109247	4.39e-05	6.18e-05	5.46e-05	7.11e-05	5.58e-05	4.37e-05	3.81e-05	0.000111144	7.76e-05	0.000473567	6.93e-05	0.00041572	0.000126286	0.00014726	0.000159	0.00607397	0.00635911	0.0104797	0.0099395	0.00831889	0.00837125	0.00951164	0.00963489
Ethyl trans-4-decenoate	4.49e-05	8.84e-06	6.44e-05	4.08e-05	4.5e-05	1.55e-05	1e-14	3.69e-06	2.11e-05	1.81e-05	5.85e-05	5.9e-05	0.00172389	0.00166256	2.15e-06	1e-14	0.000261763	0.000277678	0.000301904	0.000287099	0.000338491	0.000384607	1.84e-05	2.22e-05
Hexanoic acid, hexyl ester	0.00371137	0.00216324	0.00184033	0.00157038	0.00262175	0.00218638	0.00264763	0.00227402	0.000243868	0.000226672	0.000222814	0.000195087	0.000287888	0.00025612	0.000546269	0.000517337	0.00100781	0.00108313	0.00105756	0.000990795	0.000927791	0.000905339	0.00425834	0.00431124
Cyclohexane, 1-ethenyl-1-methyl-2,4-bis(1-methylethenyl)-, [1S-(1.alpha.,2.beta.,4.beta.)]-	5.73e-05	4.31e-05	4.4e-05	3.42e-05	4.89e-05	4.38e-05	4.7e-05	3.83e-05	9.53e-05	9.63e-05	0.000188953	0.000182871	0.000159049	0.000153173	0.000232307	0.000237407	0.00586599	0.00623722	0.00642533	0.00582641	0.00558389	0.00543276	0.0144523	0.0145427
Butanoic acid, octyl ester	5.74e-05	4.1e-05	3.03e-05	4.52e-05	2.42e-05	4.88e-05	3.11e-05	3.39e-05	7.62e-05	6.5e-05	4.65e-05	4.09e-05	3.86e-05	3.15e-05	7.28e-06	4.7e-06	0.00119986	0.0012441	0.000216188	0.000203525	0.000655475	0.000656174	0.00727182	0.00724714
2-Dodecanone	1.05e-05	1.13e-05	9.04e-06	1.8e-05	6.06e-06	1.17e-05	1e-05	5.48e-06	0.00160672	0.00156838	0.00216741	0.00189495	0.0014267	0.00129912	4.1e-05	3.53e-05	6.41e-05	4.85e-05	4.91e-05	6.13e-05	3.98e-05	4.71e-05	8.32e-05	6.67e-05
Decanoic acid, ethyl ester	0.00238497	0.00138955	0.00315066	0.0027691	0.00172069	0.00140476	0.00039339	0.00033531	7.68e-05	8.02e-05	0.000651294	0.000649863	0.0223153	0.023933	0.00019938	0.000236759	0.0545528	0.0530664	0.0456397	0.0465124	0.0534059	0.0526406	0.00909251	0.00893787
(1R,5R)-2-Methyl-5-((R)-6-methylhept-5-en-2-yl)bicyclo[3.1.0]hex-2-ene	8.1e-06	1.21e-05	1.05e-05	1.7e-05	1.01e-05	1.16e-05	7.5e-06	1.45e-05	0.00028249	0.000284397	0.000367242	0.000342951	0.000293752	0.000279404	0.000385441	0.000420868	0.000861792	0.000948309	0.00166037	0.00157099	0.00108902	0.00106553	0.0026461	0.00275793
Tetracyclo[3.3.1.1(1,8).0(2,4)]decane	3.06e-05	2.37e-05	2.93e-05	2.49e-05	4.76e-05	2.46e-05	1.82e-05	2.03e-05	3.54e-05	3.65e-05	4.05e-05	4.05e-05	2.56e-05	3.33e-05	3.38e-05	3.58e-05	0.000510129	0.00056696	0.000621225	0.000616357	0.000554258	0.000551335	0.00268191	0.00260782
Dodecanal	5.11e-05	3.5e-05	4.47e-05	2.69e-05	3.38e-05	2.84e-05	5.37e-05	2.65e-05	0.00029144	0.000273122	0.000309371	0.000281812	0.000280721	0.000262384	0.000363517	0.000377291	0.00299315	0.00328537	0.00274685	0.00267786	0.00348898	0.00354165	0.0162906	0.0165036
Acetic acid, decyl ester	5.01e-05	5.29e-05	5.93e-05	4.63e-05	4.5e-05	4.27e-05	5e-05	4.39e-05	0.00022891	0.00020694	0.000198993	0.000184816	0.000197731	0.000194197	0.000183827	0.000190427	0.00908136	0.00997239	0.00825617	0.00797037	0.0106665	0.0107378	0.0246187	0.0250208
Caryophyllene	3.54e-05	1.7e-05	2.21e-05	1.89e-05	1.97e-05	1.6e-05	1.54e-05	1.84e-05	0.0125376	0.012083	0.0182269	0.0173808	0.0157451	0.015334	0.0221551	0.0223931	0.00679868	0.00723948	0.00489707	0.00446165	0.00620462	0.0059901	0.0117171	0.012065
.alpha.-Ionone	3.45e-06	5.32e-07	1.17e-05	8.08e-07	7.57e-06	1e-14	6.02e-06	1e-14	0.0265089	0.0262761	0.0218904	0.020197	0.0207387	0.0205324	0.0342312	0.0344528	0.000159955	0.000173701	0.000243634	0.000235714	0.000232612	0.000223394	0.000165013	0.000151723
Germacrene D	6.15e-06	9.58e-07	1e-14	1.82e-06	2.1e-06	6.96e-06	2.04e-06	2.85e-06	0.00010906	0.000122988	0.000110752	0.000108483	9.15e-05	8.47e-05	3.92e-05	2.41e-05	0.0018687	0.00196609	0.00271428	0.00246665	0.00240708	0.00239359	0.00404205	0.00441143
trans-.alpha.-Bergamotene	7.35e-05	4.95e-05	4.99e-05	3.45e-05	5.52e-05	4.14e-05	5.73e-05	5.72e-05	0.00341158	0.00329493	0.00453879	0.00398195	0.0034296	0.00323077	0.00507179	0.00521881	8.19e-05	7.7e-05	9.75e-05	0.00010627	7.31e-05	6.82e-05	0.000239788	0.000233757
Bicyclo[3.1.1]hept-2-ene, 2,6-dimethyl-6-(4-methyl-3-pentenyl)-	5.07e-05	1.43e-05	2.35e-05	2.72e-05	1.91e-05	2.18e-05	3.5e-05	2.65e-05	0.00332636	0.00317096	0.00442948	0.00383494	0.00337179	0.00321558	0.00503323	0.00515847	8.24e-05	8.01e-05	0.000105561	9.32e-05	7.68e-05	7.73e-05	0.000211806	0.000204748
1,4-benzenediol, 2-(1,1-dimethylethyl)-, 4-acetate	1.4e-06	9.05e-06	1.88e-06	7.07e-06	2.21e-06	7.4e-06	1e-14	7.06e-06	8.71e-06	1.44e-05	2.18e-05	1.3e-05	4.68e-06	1.4e-05	0.00320249	0.00321515	9.87e-06	2.19e-06	2.43e-06	1e-14	5.01e-06	6.05e-06	8.3e-06	6.34e-06
Humulene	1.01e-05	1e-14	1.08e-05	4.04e-06	2.28e-05	1.4e-05	2.16e-05	1.18e-05	0.00803446	0.0076082	0.010303	0.00955766	0.00779827	0.00781703	0.0144093	0.0146505	0.00282759	0.00297552	0.00278195	0.00251236	0.00279215	0.0027824	0.00720353	0.00736695
2-Methylbutyl octanoate	0.000520542	0.000292756	0.000349978	0.00032157	0.000375401	0.000311077	0.000590369	0.000482041	0.00428945	0.00373896	0.00488252	0.00470766	0.00297792	0.00324463	0.00034755	0.000173337	0.00155649	0.0010215	0.000474918	0.000456633	0.000728567	0.000770824	0.000206919	0.000201847
cis-.beta.-Farnesene	0.000462788	0.000250477	0.000231385	0.000223604	0.000367597	0.00030301	0.000233103	0.000160961	0.00105676	0.000981879	0.00232056	0.00196563	0.00161626	0.00150811	0.00234863	0.00240954	0.00636565	0.00654396	0.0127446	0.0114067	0.00867106	0.00862598	0.0165534	0.0163231
(E)-.beta.-Famesene	0.000610681	0.000340466	0.000303735	0.000292584	0.000492226	0.00039672	0.000338976	0.000231692	0.00148393	0.00137762	0.00316686	0.00268211	0.00219162	0.00203626	0.00315616	0.00320236	0.00849984	0.00874528	0.0171825	0.0156221	0.0118426	0.0115787	0.0222921	0.0226545
trans-.beta.-Ionone	2.76e-05	4.1e-05	7.07e-05	6.07e-05	2.67e-05	2.56e-05	3.73e-05	5.89e-05	0.0340173	0.0313687	0.0282636	0.025463	0.0269208	0.024994	0.0481167	0.0472914	0.000131774	0.000139144	0.00014066	0.000148004	0.000164733	0.000159358	0.000252105	0.000245563
4a,8-Dimethyl-2-(prop-1-en-2-yl)-1,2,3,4,4a,5,6,7-octahydronaphthalene	1.95e-05	1.06e-07	7.76e-06	8.58e-06	1.9e-05	1.73e-05	7.61e-06	1e-14	1e-14	4.66e-06	2.49e-07	2.25e-06	1e-14	3.38e-06	1.4e-05	1e-14	0.00275094	0.00296621	0.00149907	0.00136041	0.00173547	0.00170721	0.00417004	0.00417571
3-Buten-2-one, 4-(2,2,6-trimethyl-7-oxabicyclo[4.1.0]hept-1-yl)-	1.61e-05	9.8e-06	1.53e-05	1.32e-05	2.68e-05	2.21e-06	5.34e-06	1.82e-05	0.019061	0.0178144	0.00973119	0.00877409	0.0107001	0.00994754	0.0208239	0.0203829	0.000602163	0.000609151	0.00036144	0.000336893	0.000411432	0.000403203	0.000899438	0.000903185
Benzene, 1-(1,5-dimethyl-4-hexenyl)-4-methyl-	5.06e-05	2.89e-05	3.46e-05	1.13e-05	3.96e-05	2.03e-05	2.91e-05	4.03e-05	0.00215975	0.00203129	0.00340982	0.00303958	0.00274317	0.00257356	0.00384382	0.00389092	0.000915276	0.0010447	0.000512603	0.00044327	0.000593511	0.000603608	0.00135163	0.00143499
Aromandendrene	0.00213496	0.00107614	0.00116238	0.000946025	0.00153165	0.00111502	0.00147746	0.00113664	9.02e-05	7.84e-05	0.000130645	0.000104897	0.000120013	9.93e-05	9.32e-05	0.0001	0.00280705	0.00292911	0.00161672	0.00127227	0.00185278	0.001863	0.00440541	0.00461874
Undecanoic acid, ethyl ester	1.24e-05	7.45e-07	2.72e-05	2.31e-05	1.93e-05	2.43e-06	6.93e-06	1.15e-05	1.9e-06	2.27e-06	2.49e-07	3.71e-06	5.51e-05	5.76e-05	4.55e-06	2.51e-06	0.00124228	0.00117937	0.000777983	0.000781012	0.00117253	0.00122518	0.000105903	0.000114618
Benzene, 1-methyl-4-(1,2,2-trimethylcyclopentyl)-, (R)-	5.61e-06	1e-14	2.39e-06	1e-14	1.3e-05	1e-14	1.41e-05	3.9e-06	0.00499788	0.00475669	0.00561869	0.00505481	0.00491086	0.00447883	0.00663225	0.0069133	2.73e-06	1.13e-05	5.44e-06	1e-14	1e-14	1.51e-06	1.49e-05	9.98e-06
.alpha.-Farnesene	0.0293608	0.0191646	0.019728	0.0176616	0.0248731	0.0200914	0.0231381	0.0199019	0.00453485	0.00438687	0.00596504	0.00532817	0.00487431	0.00467613	0.00690335	0.00720522	0.00509137	0.00548307	0.00676792	0.00642484	0.00593667	0.00599733	0.0110304	0.0116368
(2R,8R,8aS)-8,8a-Dimethyl-2-(prop-1-en-2-yl)-1,2,3,7,8,8a-hexahydronaphthalene	0.000242891	2.81e-05	9.09e-05	3.18e-05	6.08e-05	3.12e-05	4.4e-05	3.79e-05	0.000426861	0.000411429	0.001425	0.00120042	0.000998545	0.000992049	0.00129531	0.00132311	0.00211548	0.00230489	0.00211417	0.00185448	0.00141703	0.00141738	0.00335642	0.00340334
Geranyl isobutyrate	5.29e-05	2.31e-05	2.49e-05	1.74e-05	2.46e-05	3.49e-05	2.94e-05	1.72e-05	0.00147081	0.00134631	0.00183346	0.00160287	0.00165542	0.00157087	0.00296001	0.00286135	0.000182529	0.000219913	0.000427257	0.000408271	0.000216921	0.000237695	0.000328821	0.000331779
(2S,4aR,8aR)-4a,8-Dimethyl-2-(prop-1-en-2-yl)-1,2,3,4,4a,5,6,8a-octahydronaphthalene	3.15e-05	1.35e-05	1.95e-05	1.74e-05	3.68e-05	5.75e-06	4.34e-05	3.2e-05	2.01e-05	2.01e-05	5.34e-05	3.11e-05	2.88e-05	2.88e-05	4.28e-05	4.45e-05	0.00487371	0.00506727	0.00271972	0.0024772	0.00275485	0.00271826	0.00696555	0.00700893
(-)-.alpha.-Panasinsen	5.45e-05	2.44e-05	2.85e-05	4.01e-05	3.61e-05	2.36e-05	4.34e-05	2.76e-05	2.19e-05	2.1e-05	1.45e-05	1.39e-05	9.3e-06	1.4e-05	2.19e-05	2.58e-05	0.00512987	0.0053337	0.00291511	0.00267303	0.00293638	0.00289295	0.00739954	0.00744183
1-Isopropyl-4,7-dimethyl-1,2,3,5,6,8a-hexahydronaphthalene	2.02e-05	6.82e-06	1.39e-05	2.62e-05	9.55e-06	1.54e-05	4.88e-06	4.22e-07	4.71e-05	3.89e-05	0.000115492	9.51e-05	5.51e-05	6.89e-05	0.0001212	0.000115018	0.00261951	0.00270085	0.00207828	0.00186408	0.00294841	0.0029726	0.00445401	0.00456976
1,3-Benzodioxole, 4-methoxy-6-(2-propenyl)-	8.1e-06	1e-14	1e-14	1.33e-05	1e-14	1e-14	5.79e-06	7.91e-06	0.00108748	0.00101129	0.00188186	0.00169561	0.0013712	0.00134047	0.00197635	0.001934	1e-14	3.05e-06	1e-14	2.7e-06	1e-14	4.54e-06	5.02e-06	1.82e-06
2(4H)-Benzofuranone, 5,6,7,7a-tetrahydro-4,4,7a-trimethyl-, (R)-	2.67e-05	1.26e-05	2.08e-05	2.71e-05	2.32e-05	1.9e-05	3.32e-05	1.56e-05	0.00290147	0.00268299	0.00210698	0.00184153	0.00198471	0.00186873	0.00259889	0.00224925	2.04e-05	1.97e-05	2.02e-05	1.56e-05	1.95e-05	2.73e-05	4.04e-05	3.12e-05
Cyclohexene, 3-(1,5-dimethyl-4-hexenyl)-6-methylene-, [S-(R*,S*)]-	0.000294923	9.64e-05	0.00018062	0.000110186	0.000135112	0.000101998	0.000214587	0.000145045	0.00023645	0.000223118	0.000339865	0.000275795	0.000253887	0.000248414	0.000418368	0.00044047	0.00153674	0.00170755	0.00300985	0.00268852	0.00204443	0.00211988	0.00408777	0.00423447
(E)-1-Methyl-4-(6-methylhept-5-en-2-ylidene)cyclohex-1-ene	0.000465163	0.00023429	0.000296483	0.000209465	0.000353736	0.000243447	0.000288425	0.000281551	0.00975257	0.00922818	0.0307056	0.0285859	0.0260186	0.0251913	0.0349218	0.0344802	0.000361437	0.000389391	0.000337003	0.000324273	0.000380852	0.000382801	0.000948172	0.000921332
Dodecanoic acid, methyl ester	0.000404818	0.000222043	0.000267731	0.000230876	0.000312038	0.00025726	0.000128139	9.36e-05	0.000393205	0.000326864	0.00100425	0.00111637	0.00190362	0.00210434	1.91e-05	2.6e-05	0.00258061	0.00220351	0.0018746	0.00185289	0.00178354	0.00194451	0.000591235	0.000591577
9,12-Tetradecadien-1-ol, (Z,E)-	3.27e-05	5.43e-06	4.86e-06	1.15e-05	1.78e-05	1.96e-05	1.74e-05	1.87e-05	6.14e-05	5.74e-05	0.000301576	0.000269839	0.00024506	0.000234832	0.000307757	0.00031395	0.00248282	0.00259682	0.00231843	0.00226047	0.00267313	0.00258087	0.00653712	0.00641789
2,6-Octadien-1-ol, 3,7-dimethyl-, propanoate, (Z)-	2.46e-05	7.99e-06	6.65e-06	1.03e-05	5.94e-06	2.55e-05	1.7e-05	1.33e-05	3.07e-05	2.15e-05	3.63e-05	4.47e-05	3.2e-05	3.88e-05	3.08e-05	4.37e-05	8.5e-05	6.79e-05	5.26e-05	4.98e-05	4.36e-05	5.02e-05	0.000449652	0.000424608
2(3H)-Furanone, 5-heptyldihydro-	1.61e-05	1.81e-06	1.3e-05	1.99e-05	1.74e-05	1.51e-05	1.15e-05	3.37e-06	0.00494553	0.00472733	0.00349425	0.00311658	0.00344287	0.00329159	0.000100435	8.89e-05	1.74e-05	2.36e-05	4.05e-05	2.84e-05	1.97e-05	4.17e-05	1.7e-05	1.23e-05
Caryophyllene oxide	4.48e-05	4.1e-05	2.26e-05	2.83e-05	2.49e-05	3.56e-05	3.66e-05	3.65e-05	0.00283746	0.00270524	0.00291742	0.00251212	0.00284393	0.00278162	0.0056442	0.00547817	0.000240875	0.000256099	0.000170111	0.000166299	0.000194512	0.000207239	0.000448915	0.000444104
(Z)-Hex-3-enyl isobutyl carbonate	2.41e-05	1.64e-05	1.85e-05	1.28e-05	1.48e-05	1.93e-05	2.29e-05	2.7e-05	1.68e-05	1.81e-05	2.05e-05	1.41e-05	2.28e-05	1.98e-05	1.52e-05	1.95e-05	0.000263648	0.000253809	0.000147468	0.00015214	0.00021662	0.000218367	0.0021459	0.0020636
Diethyl Phthalate	0.000544183	0.000894349	0.00193435	0.00107873	1e-14	0.000332626	1e-14	0.0015275	0.00280693	0.00252967	0.0030611	0.00264886	0.00320308	0.00309628	0.00318165	0.00304165	0.00420318	0.00320775	0.00357682	0.00438195	0.00310497	0.00271284	0.00480847	0.00558959
Dodecanoic acid, ethyl ester	0.000717013	0.000384023	0.00121375	0.000986222	0.000563625	0.0004512	0.000109395	9.17e-05	2.08e-05	1.71e-05	7.82e-05	7.18e-05	0.00155264	0.0016247	9.68e-06	2.43e-05	0.023274	0.0220604	0.017694	0.0170139	0.0220704	0.0222513	0.000320721	0.000470954
Butanoic acid, 2-methyl-, 3,7-dimethyl-2,6-octadienyl ester, (E)-	7.15e-05	2.03e-05	8.64e-05	3.63e-05	5.65e-05	3.07e-05	0.000145065	0.000129549	0.00934214	0.00901609	0.0108507	0.00995063	0.0099598	0.00962623	0.0167392	0.0165474	0.00107503	0.00102994	0.000535774	0.000529548	0.00109844	0.00127852	4.33e-05	5.28e-05
Pentadecanoic acid, 3-methylbutyl ester	2.42e-05	2.1e-05	1.78e-05	1.38e-05	1.84e-05	1.94e-05	2.07e-05	1.51e-05	0.000458065	0.000402912	0.00068896	0.000600332	0.000533067	0.00047227	4.29e-05	3.44e-05	0.00143419	0.00144188	0.000719766	0.000683067	0.00129832	0.00132611	2.02e-05	2.91e-05
2,6,11-Dodecatrienal, 2,6-dimethyl-10-methylene-	1e-14	7.03e-06	3.58e-06	4.85e-06	9.09e-06	1e-14	1.09e-05	1.2e-05	3.68e-05	3.09e-05	3.29e-05	2.97e-05	3.16e-05	2.98e-05	4.1e-05	4.23e-05	3.81e-05	7.08e-05	0.000135065	0.000246903	5.05e-05	4.5e-05	0.013656	0.0128002
2,6,9,11-Dodecatetraenal, 2,6,10-trimethyl-, (E,E,E)-	1.66e-05	1.03e-05	8.28e-06	1.46e-05	1.51e-05	1.77e-06	1.48e-05	2e-06	2.07e-05	1.73e-05	1.82e-05	1.56e-05	1.45e-05	1.49e-05	1.6e-05	1.64e-05	3.59e-05	5.91e-05	0.000121342	0.000114278	7.34e-05	8.41e-05	0.00405697	0.00385716
Decanoic acid, 3-hexenyl ester, (Z)-	1.66e-05	1.29e-05	6.48e-06	1.13e-05	1.62e-05	8.4e-06	1e-05	1.18e-05	1.5e-05	1.42e-05	1.02e-05	8.27e-06	1.11e-05	7.54e-06	1e-05	9.8e-06	0.000127458	0.000119448	9.01e-05	0.000107437	0.00012157	0.000117627	0.00236641	0.00225567
Octanoic acid, octyl ester	2.19e-05	5.32e-06	1.12e-05	1.32e-05	1.7e-05	1.71e-05	3.64e-06	2.49e-05	2.7e-05	1.87e-05	2.22e-05	2.49e-05	1.77e-05	2.06e-05	1.73e-05	1.5e-05	9.64e-05	0.000108201	0.000123453	0.00012658	0.000142826	0.000142861	0.000731948	0.000703227
Nootkatone	1.47e-05	5.86e-06	1e-14	7.37e-06	1.86e-06	1.77e-06	6.59e-06	7.69e-06	1.9e-05	1e-14	1.15e-05	8.81e-06	6.99e-06	5.38e-06	2.04e-05	6.4e-06	0.000477831	0.000502833	0.000371679	0.00035259	0.000407472	0.00040535	0.000943753	0.000940761
Tetradecanoic acid, ethyl ester	5.45e-05	2.63e-05	7.66e-05	7.62e-05	6.06e-05	2.5e-05	2.43e-05	2.64e-05	2.82e-06	1e-14	2.12e-06	1.34e-06	3.13e-05	3.1e-05	5.79e-07	1e-14	0.00234966	0.00241396	0.00284275	0.00247243	0.00278237	0.0031426	3.1e-05	9.86e-05
1,2-Benzenedicarboxylic acid, bis(2-methylpropyl) ester	0.00102046	0.00226676	0.0012227	0.00199971	0.00128973	0.0021761	0.00141804	0.00177659	0.00180988	0.00124293	0.000717085	0.00130544	0.00133601	0.00114306	0.00159438	0.00196437	0.00111423	0.00104496	0.0011106	0.00180087	0.00145794	0.00102233	0.00105655	0.000647435
Benzoic acid, 2-hydroxy-, phenylmethyl ester	0.000335405	0.000631199	0.0114568	0.00163754	1e-14	0.000209742	7.38e-06	0.00383514	0.00106332	0.000206021	0.00204512	0.00355088	0.000743474	0.00954291	0.000252824	0.000656736	0.0155481	0.00103345	0.00175532	0.00214253	0.000514454	0.0008107	0.00474186	0.00929596
Pentadecanoic acid, ethyl ester	7.34e-06	2.45e-06	9.13e-06	3.53e-06	1.84e-05	1.81e-05	1.05e-05	7.17e-06	5.82e-06	2.14e-06	3.31e-06	6.69e-06	8.47e-06	6.93e-06	8.85e-06	3.56e-06	0.000382324	0.000495861	0.000820788	0.00066509	0.00056634	0.00064612	7.36e-06	2.79e-05
7-Hexadecenoic acid, methyl ester, (Z)-	0.000792363	0.000445897	0.000497238	0.000372876	0.000560713	0.000430203	6.5e-05	5.02e-05	6.65e-05	4.68e-05	7.1e-05	8.05e-05	0.000146017	0.000163429	8.11e-06	1.38e-05	7.05e-05	7.96e-05	9.34e-05	8.17e-05	6.39e-05	7.05e-05	4.85e-05	4.67e-05
5,9,13-Pentadecatrien-2-one, 6,10,14-trimethyl-, (E,E)-	0.000281537	0.000161128	0.000219696	0.000133112	0.000216062	0.000153605	4.44e-05	1.53e-05	0.00465213	0.00426786	0.0039488	0.00300913	0.00196392	0.00163124	0.0080864	0.00828574	0.000148891	0.000184491	0.000135118	0.000123505	0.000364459	0.000409157	0.000474621	0.000450783
Geranyl caprylate	5.68e-05	2.31e-05	1.57e-05	2.8e-05	6.34e-05	3.46e-05	3.35e-05	2.26e-05	2.75e-05	2.78e-05	2.55e-05	2.29e-05	2.09e-05	1.85e-05	2.91e-05	2.07e-05	5.23e-05	7.03e-05	7.72e-05	7.71e-05	0.000102169	0.000104156	0.000392483	0.000354852
Hexadecanoic acid, methyl ester	0.000439254	0.000237485	0.000313888	0.00025764	0.000377497	0.000276599	0.000166421	0.00010794	5.93e-05	5.14e-05	8.99e-05	6.66e-05	9.76e-05	7.76e-05	2.09e-05	2.92e-05	0.000432583	0.00058574	0.00164173	0.00133082	0.000678485	0.000788395	0.00160447	0.00152364
Dibutyl phthalate	0.000710644	0.000898183	0.000777169	0.000917545	0.000776892	0.00100197	0.000652053	0.00079005	0.0010559	0.000714272	0.000607704	0.000717141	0.000764918	0.000746462	0.000896797	0.00104277	0.000800519	0.000711855	0.00076199	0.000928804	0.000828881	0.00073495	0.000798957	0.00066167
Ethyl 9-hexadecenoate	0.000552927	0.000313203	0.000861891	0.000681518	0.0004673	0.000317707	8.5e-05	6.78e-05	1.99e-05	1.88e-05	1.88e-05	3.05e-05	0.000174747	0.000149071	1.1e-05	2.58e-05	0.000817933	0.000882249	0.00111224	0.000914486	0.000964086	0.00114552	0.000162737	0.000168251
Hexadecanoic acid, ethyl ester	0.000279054	0.000149094	0.000386665	0.000338032	0.000279774	0.000175927	0.000116097	6.6e-05	5.46e-06	1.23e-07	1.75e-05	2.27e-05	9.61e-05	9.14e-05	1.9e-06	1.86e-05	0.00374674	0.00590661	0.0107103	0.0079123	0.0068422	0.00839443	0.000812479	0.00125433
9,12-Octadecadienoic acid, methyl ester	0.000462788	0.000239934	0.000293326	0.000209061	0.000368995	0.000253613	5.08e-05	2.5e-05	1.36e-05	5.15e-06	2.13e-05	1.99e-05	4.19e-05	3.49e-05	2.48e-06	6.32e-06	9.23e-05	0.000109473	0.000129998	0.000129497	9.11e-05	0.000117139	0.000443225	0.000409429
Cyclohexene, 4-(4-ethylcyclohexyl)-1-pentyl-	0.000143683	8.81e-05	0.000280955	0.000201385	0.000135461	9.3e-05	1.56e-05	1.48e-05	5.64e-06	1.06e-05	1e-05	1.12e-05	2.86e-05	2.01e-05	3.39e-06	8.91e-07	0.000740734	0.000919401	0.000902175	0.00065475	0.000828931	0.00113152	0.000150152	0.000192605
Linoleic acid ethyl ester	0.000246453	0.000131628	0.000428983	0.000305108	0.000198125	0.000146532	2.93e-05	1.71e-05	1.31e-05	6.62e-06	9.35e-06	9.85e-06	2.38e-05	2.3e-05	6.2e-06	2.43e-06	0.00115635	0.00140971	0.00140179	0.00100686	0.00127114	0.00175416	0.00021609	0.000297306
Ethyl Oleate	3.44e-05	9.37e-06	6.87e-05	4.49e-05	4.1e-05	3.09e-05	1.92e-05	7.38e-06	1.42e-05	8.33e-06	1.93e-05	1.06e-05	1.69e-05	2.12e-05	3.31e-06	7.86e-06	0.000438388	0.000703152	0.000724939	0.000516609	0.000861968	0.00105562	0.000153499	0.000201645
9-Octadecenoic acid	1.26e-05	8.95e-06	1.61e-05	2.24e-05	1.43e-05	1.29e-05	6.13e-06	9.17e-06	1.05e-05	4.78e-06	1.09e-05	9.12e-06	1.63e-05	4.66e-06	4.47e-06	2.19e-06	0.000162088	0.000289791	0.000310349	0.000196314	0.000335382	0.000416576	5.98e-05	9.05e-05
