# Supplementary material
Source: MDPI journal article supplement (https://www.mdpi.com/2311-5637/8/9/457)
Supplement: s1 [file s1 › Supplementary Table S1.pdf]

## Supplementary Table

**Table S1.** Forward and reverse primers used in fungal 5.8S rDNA amplification

| Primers         | Sequence             |
|-----------------|----------------------|
| ITS 1 (forward) | TCCGTAGGTGAACCTGCGG  |
| ITS 4 (reverse) | TCCTCCGCTTATTGATATGC |
